# Supplementary material
Source: PubMed Central journal article supplement (PMC2783974)
Supplement: NIHMS152241-supplement-1_si_001.pdf [file NIHMS152241-supplement-1_si_001.pdf]

## Supporting Information

# Substrate Redox Potential Controls Superoxide Production Kinetics in the Cytochrome *bc* Complex<sup>†</sup>

*Jonathan L. Cape<sup>‡</sup>, Divesh Aidasani<sup>‡</sup>, David M. Kramer<sup>‡</sup>, Michael K. Bowman<sup>§\*</sup>*

<sup>‡</sup>Institute of Biological Chemistry, Washington State University, 289 Clark Hall, Pullman,  
Washington 99164-6314, <sup>§</sup>Department of Chemistry, Box 870336, The University of Alabama,  
Tuscaloosa, Alabama 35487-0336 mkbowman@as.ua.edu

### I. Chemical Syntheses.

2,3-dimethoxy-5-chloro-6-undecyl-1,4-benzoquinone (**1**): 1 g of chloranil was suspended in 50 mL MeOH and refluxed for 3 hours to yield a bright red solution (*1*). A red residue was obtained by evaporation of the solvent and was chromatographed on silica gel to yield 2-chloro-3,5,6-trimethoxy-1,4-benzoquinone (~100mg) (along with other substituted chloromethoxybenzoquinones). Radical alkylation of 1,4-benzoquinone derivatives was carried out as described by Gu et al. (2) and Folkers et al. (3). 100 mg of 2-chloro-3,5,6-trimethoxy-1,4-benzoquinone and 0.200g lauroyl peroxide were dissolved in 25 mL acetic acid and refluxed for 4 hours. The red residue obtained upon evaporation of the acetic acid was chromatographed on silica gel (CHCl<sub>3</sub>), yielding ~50 mg of (**1**) as a red oil. This compound was not isolated in sufficient yields for <sup>13</sup>C-NMR analysis. <sup>1</sup>H-NMR (300 MHz, CDCl<sub>3</sub>); δ 4.03 (s, 3H, OMe), 3.99

Substrate Redox Potential in the *bc* Complex

(s, 3H, OMe), 2.05 (m, 2H, CH<sub>2</sub>) 1.25 (m, 18H, CH<sub>2</sub>), 0.87 (t, 3H, CH<sub>3</sub>); MS(ESI): m/z= 356.4 [M<sup>+</sup>] (calc. 356.5).

2-methoxy-5-methyl-6-undecyl-1,4-benzoquinone (**2**). 3.26 g (10.9 mmol) sodium dichromate was added in small aliquots to 0.5 g (3.6 mmol) of 2-methoxy-5-methylaniline dissolved in a 1:1 mixture of H<sub>2</sub>SO<sub>4</sub> and water over ice (4). The suspension was slowly warmed to room temperature and stirred overnight. The reaction mixture was extracted with CHCl<sub>3</sub> (3X, 50 mL), washed with concentrated sodium carbonate, dried over Na<sub>2</sub>SO<sub>4</sub>, and evaporated to dryness to yield 200 mg of 2-methoxy-5-methyl-1,4-benzoquinone (~80% purity). The undecyl derivative of the parent quinone was prepared as described above for compound (**1**). The reaction mixture was dried by evaporation, re-dissolved in CHCl<sub>3</sub> and chromatographed on silica gel (CHCl<sub>3</sub>). Fractions containing the monosubstituted products were combined and dried over Na<sub>2</sub>SO<sub>4</sub>, and evaporated to dryness to yield approximately 100 mg of a yellow oil (~23% yield). 2-methoxy-3-undecyl-5-methyl-1,4-benzoquinone was also isolated as a minor product. <sup>1</sup>H-NMR (300 MHz, CDCl<sub>3</sub>); δ 5.87 (s 1H, ring), 3.79 (s 3H, OCH<sub>3</sub>), 2.48 (m 2H, CH<sub>2</sub>), 2.04 (s 3H, CH<sub>3</sub>), 1.57 (br, CH<sub>2</sub>), 1.25 (br, CH<sub>2</sub>), 0.85 (t 3H, CH<sub>3</sub>). <sup>13</sup>C-NMR (75 MHz, CDCl<sub>3</sub>); 188.3 (C=O), 182.3 (C=O), 158.5 (ring (C-OCH<sub>3</sub>), 143.4 (ring C-CH<sub>3</sub>), 141.4 (ring C-CH<sub>2</sub>), 107.2 (ring CH), 56.3 (OCH<sub>3</sub>), 32.1 (CH<sub>2</sub>), 29.9 (CH<sub>2</sub>), 29.8 (CH<sub>2</sub>), 29.7 (CH<sub>2</sub>), 29.5 (CH<sub>2</sub>), 29.4 (CH<sub>2</sub>), 29.3 (CH<sub>2</sub>), 28.7 (CH<sub>2</sub>), 26.5 (CH<sub>2</sub>), 22.8 (CH<sub>2</sub>), 14.3 (ring CH<sub>3</sub>), 12.3 (CH<sub>3</sub>); MS(ESI) m/z = 307.6 (M+H<sup>+</sup>) (calc. 306.4).

2,6-dimethyl-5-undecyl-1,4-benzoquinone (**4**): 300 mg 2,6-dimethyl-1,4-benzoquinone (2.2 mmol) and 1.31 g lauroyl peroxide (0.0033 mmol) were dissolved in 20 mL glacial acetic

Substrate Redox Potential in the *bc* Complex

acid and refluxed for 48 hours. The reaction mixture was dried by evaporation, re-dissolved in  $\text{CHCl}_3$  and chromatographed on silica gel (1:1 hexanes: $\text{CHCl}_3$ ). Three compounds were collected corresponding to the starting quinone, mono-, and di-substituted products. Fractions containing the monosubstituted product were combined and dried over  $\text{Na}_2\text{SO}_4$ , and evaporated to dryness to yield approximately 300 mg of a yellow oil (~50%).  $^1\text{H-NMR}$  (300 MHz,  $\text{CDCl}_3$ );  $\delta$  6.42 (m 1H, ring), 2.38 (m 2H, alkyl- $\text{CH}_2$ ), 1.98 (s 6H, alkyl- $\text{CH}_2$ ), 1.44 (m 2H, alkyl- $\text{CH}_2$ ), 1.23 (m 6H, ring- $\text{CH}_3$ ), 0.82 (t 3H, alkyl- $\text{CH}_3$ ).  $^{13}\text{C-NMR}$  (75 MHz,  $\text{CDCl}_3$ );  $\delta$  188.6 (C=O), 187.6 (C=O), 145.4 (ring CH), 145.1 (ring CH), 140.7 (C- $\text{CH}_2$ ), 133.4 (C- $\text{CH}_3$ ), 32.1 ( $\text{CH}_2$ ), 30.1 ( $\text{CH}_2$ ), 29.8 ( $\text{CH}_2$ ), 29.7 ( $\text{CH}_2$ ), 29.6 ( $\text{CH}_2$ ), 29.5 ( $\text{CH}_2$ ), 29.4 ( $\text{CH}_2$ ), 28.9 ( $\text{CH}_2$ ), 26.6 ( $\text{CH}_2$ ), 22.9 ( $\text{CH}_2$ ), 16.1 (ring C- $\text{CH}_3$ ), 14.3 (ring C- $\text{CH}_3$ ), 12.3 ( $\text{CH}_2$ - $\text{CH}_3$ ).

2,6-dimethoxy-5-undecyl-1,4-benzoquinone (**5**): Prepared in a similar manner to (**1**) above. 160 mg 2,6-dimethoxy-1,4-benzoquinone (0.97 mmol) and 0.53 g lauroyl peroxide (1.5 mmol) were dissolved in 20 mL glacial acetic acid and refluxed for 8 hours. The reaction mixture was dried by evaporation, re-dissolved in  $\text{CHCl}_3$  and submitted to chromatography on silica gel ( $\text{CHCl}_3$ ). Fractions containing the monosubstituted product were combined and dried over  $\text{Na}_2\text{SO}_4$ , and evaporated to dryness to yield approximately 200 mg of a yellow oil (~65%).  $^1\text{H-NMR}$  (300 MHz,  $\text{CDCl}_3$ );  $\delta$  5.83 (m 1H, ring), 3.96 (s 3H, OMe), 3.79 (s 3H, OMe), 2.42 (m 2H,  $\text{CH}_2$ ), 1.56 (br m,  $\text{CH}_2$ ), 1.27 (br m,  $\text{CH}_2$ ), 0.87 (t 3H, Me).  $^{13}\text{C-NMR}$  (75 MHz,  $\text{CDCl}_3$ );  $\delta$  187.7 (C=O), 178.5 (C=O), 157.5 (ring C- $\text{OCH}_3$ ), 154.6 (ring C- $\text{OCH}_3$ ), 134.5 (ring C- $\text{CH}_2$ ), 107.2 (ring CH), 61.2 ( $\text{OCH}_3$ ), 56.7 ( $\text{OCH}_3$ ), 32.1 ( $\text{CH}_2$ ), 30.2 ( $\text{CH}_2$ ), 29.8 ( $\text{CH}_2$ ), 29.7 ( $\text{CH}_2$ ), 29.6 ( $\text{CH}_2$ ), 29.5 ( $\text{CH}_2$ ), 29.3 ( $\text{CH}_2$ ), 23.6 ( $\text{CH}_2$ ), 22.9 ( $\text{CH}_2$ ), 14.3 ( $\text{CH}_3$ ); MS(ESI):  $m/z$  = 323.9 ( $\text{M-H}^+$ ) (calc 324.4).

Substrate Redox Potential in the *bc* Complex

2-(N-dimethylamino)-5-undecyl-6-methoxy-1,4-benzoquinone (**6**): 50 mg of (**5**) was dissolved in 20 mL acetonitrile on ice. 2 mL of 1M dimethylamine in MeOH was added to the stirring solution, then warmed to room temperature and allowed to react for four hours. Following evaporation of the solvent, the purple residue was submitted to chromatography on silica gel (CHCl<sub>3</sub>) to yield a purple band, which was collected and evaporated to dryness (~30 %). This compound was not isolated in sufficient yields for <sup>13</sup>C-NMR analysis. <sup>1</sup>H-NMR (300 MHz, CDCl<sub>3</sub>); δ 5.48 (s, 1H), 3.85 (s, 3H), 3.07 (s, 6H), 2.43 (m, 2H), 1.25 (br m, CH<sub>2</sub>), 0.87 (br m, CH<sub>3</sub>); MS(ESI): m/z = 366.4 (M+H<sup>+</sup>) (calc. 365.5).

Hydroxy-3-amino-5-undecyl-methoxy-1,4-benzoquinones (**7**): 50 mg of (**5**) were dissolved in 20 mL EtOH. 40 mL concentrated NH<sub>4</sub>OH was added to the solution and refluxed for 3 hours. The red/purple solution was extracted twice with 30 mL CHCl<sub>3</sub>, and dried over Na<sub>2</sub>SO<sub>4</sub>. Chromatography on silica gel (CHCl<sub>3</sub>) yielded multiple bands, of which a dark red band was collected, dried, and re-purified by preparative TLC (CHCl<sub>2</sub>) (~5 mg). Further TLC analysis showed that this band was in fact two closely spaced bands, which we interpret as the isomers 2-hydroxy-3-amino-5-undecyl-6-methoxy-1,4-benzoquinone and 6-hydroxy-3-amino-5-undecyl-2-methoxy-1,4-benzoquinone based on broad singlet observed in <sup>1</sup>H-NMR spectra for the methoxy protons. Further preparative TLC runs did not allow clean separation of these isomers. These isomers, however, were found to have nearly the same redox properties (see below), thus justifying the use of the mixture (**7**) in this study. This compound was not isolated in sufficient yields for <sup>13</sup>C-NMR analysis. <sup>1</sup>H-NMR (300 MHz, CDCl<sub>3</sub>); δ 3.92 (s, 3H, OMe), 1.62 (q, 2H,

CH<sub>2</sub>), 1.25 (m, 18H, CH<sub>2</sub>), 0.876 (t, 3H, Me); EI-MS (1% HOAc, MeOH): MS(EI): m/z = 324 (M<sup>+</sup>) (calc 324).

## II. Calculation of substrate redox potentials.

Equations (S1) – (S3) show the chemical equations and reaction free energies required for correlation of quantum chemical calculations with experimental solution potentials, using Hartree-Fock (HF) and Density Functional Theory (DFT) calculations as previously described (5). Table 1 below gives the calculated energies for the relevant redox and protonation states of substrates (1)-(7). In each of these equations the reaction energies are given as the difference in the energy of the products and reactants. The term  $E_{elec}$  indicates the total electronic energy, and the term  $G_{correction}$  is the Gibbs free energy correction to the internal electronic energy that derived from the molecular partition function. Derivation and application of this correction is given in reference (6) and references therein.

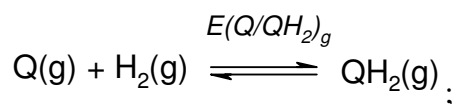

$$\begin{aligned} E(Q/QH_2)_{gas} = & [E_{elec}(QH_2) + G_{correction}(QH_2)] - [E_{elec}(Q) + G_{correction}(Q)] \\ & + 2[E_{elec}(H_2) + G_{correction}(H_2)] \end{aligned} \quad (S1)$$

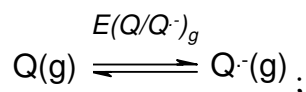

Substrate Redox Potential in the *bc* Complex

$$E(Q/Q^{\bullet-})_{gas} = [E_{elec}(Q^{\bullet-}) + G_{correction}(Q^{\bullet-})] - [E_{elec}(Q) + G_{correction}(Q)] \quad (S2)$$

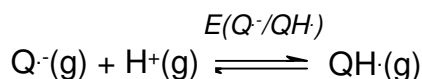

$$E(Q^{\bullet-}/QH^{\bullet})_{gas} = [E_{elec}(QH^{\bullet}) + G_{correction}(QH^{\bullet})] - [E_{elec}(Q^{\bullet-}) + G_{correction}(Q^{\bullet-})] \quad (S3)$$

Linear fits between experimental data and calculated redox potentials and pK<sub>a</sub> values (within a homologous series of water soluble benzo- and naphthoquinone species) for these reactions yields the following correlations in equations (S4)-(S6), which can then be used to predict values for homologous compounds for which no experimental data is available. (Note that these correlations have been strictly applied only to other benzo- and naphthoquinone species, the validity of applying these correlations outside these compounds has not been tested.) We have found that calculating values of E(Q/QH<sub>2</sub>) and E(Q/Q<sup>•-</sup>) at the B3LYP/6-31G(d,p) and HF/6-31G(d,p) levels of theory, respectively, yield the best results. All proton affinity values (eq. 8 above) were calculated with B3LYP/6-31G(d,p), see (5) for details of this approach.

$$E(Q/QH_2)_{estimate} = (E(Q/QH_2)_{calc} - 0.22146)/0.87508 \quad (S4)$$

$$E(Q/Q^{\bullet-})_{estimate} = (E(Q/Q^{\bullet-})_{calc} - 2.79285)/1.04474 \quad (S5)$$

$$E(Q^{\bullet-}/QH^{\bullet})_{estimate} = -22.55707 - (0.02007 / E(Q^{\bullet-}/QH^{\bullet})_{calc}) \quad (S6)$$

Values of E(Q/QH<sub>2</sub>) given in equation (S4) give values at pH 7.0; the values in Table 1 of the text are adjusted to pH 8.0. In equation (S6), E(Q<sup>•-</sup>/QH<sup>•</sup>)<sub>calc</sub> is the gas phase proton affinity in units of kJ/mole. All values for redox potentials are given in eV, with the estimates yielding

1 values relative to the standard hydrogen electrode. The results of applying the gas phase  
2 energies in Tables 1 and 2 to equations (6)-(8) are shown in Table 3 below.

3 Good agreement is found between calculated values and those obtainable from experiment,  
4 although in some cases the errors exceeded the range previously found (~30 mV) (5). However,  
5 these errors also include experimental errors, which can be substantial considering the  
6 difficulties in determining the experimental potentials by voltammetric techniques. As we noted  
7 previously (5), the methoxy-substituted, high-potential quinone species' **(1)-(3)** Q/QH<sub>2</sub> midpoint  
8 potentials represent a 'worst case' for this technique, and are overestimated by approximately 50-  
9 100 mV, which underestimates the calculated stability constants. Even the largest expected  
10 errors would not have affected the order of reactivity in this series, nor greatly affect the slope of  
11  $\log k$  vs.  $\Delta E$ , shown in Fig. 2 of the main text.

**Table 1. Relevant gas phase energies calculated for substrates (1)-(7) calculated at the B3LYP/6-31G(d,p) level.** All energies are given in hartrees, see (5) for details of this approach.

| Substrate | E(Q)         | E(QH <sub>2</sub> ) | E(Q <sup>•-</sup> ) | E(QH <sup>•</sup> ) <sup>1</sup> |
|-----------|--------------|---------------------|---------------------|----------------------------------|
| (1)       | -1109.290491 | -1110.502521        | -1109.357423        | -1109.886873 (4)                 |
| (2)       | -574.495638  | -575.70334          | -574.550308         | -575.090237 (1)                  |
| (3)       | -688.984531  | -690.194076         | -689.040173         | -689.579465 (1)                  |
| (4)       | -499.299738  | -500.498913         | -499.35225          | -499.883062(4)                   |
| (5)       | -649.695882  | -650.89606          | -649.74782          | -650.284932 (4)                  |
| (6)       | -669.110202  | -670.306076         | -669.158187         | -669.687653 (1)                  |
| (7)       | -665.779149  | -666.968632         | -665.830668         | -666.366088 (4)                  |

<sup>1</sup> The protonated conformation yielding the lowest energy is given for structurally asymmetric neutral semiquinone species. Since most of these quinone species are asymmetric with respect to the plan bisecting the C=O two fold axis, the neutral semiquinones will have differing proton affinities for either the 1- or 4- positions. We calculated both conformers, and show here the energy of species with the position the highest proton affinity. The position of protonation is given in parentheses, indicating either the 1- or 4- positions.

1 **Table 2. Relevant gas phase energies calculated for substrates (1)-(7) calculated at the**  
 2 **HF/6-31G(d,p) level for the Q/Q<sup>-</sup> couple.** All energies are given in hartrees, see (5) for details  
 3 of this approach.

4

| Substrate | E(Q)         | E(Q <sup>-</sup> ) |
|-----------|--------------|--------------------|
| (1)       | -1104.813253 | -1104.9265         |
| (2)       | -571.074064  | -571.176349        |
| (3)       | -684.901688  | -685.004585        |
| (4)       | -496.239658  | -496.337669        |
| (5)       | -606.90044   | -607.003707        |
| (6)       | -665.077692  | -665.176196        |
| (7)       | -661.938434  | -662.042938        |

5

**Table 3. Gas phase reaction energetics obtained from DFT and HF calculations.**

- Electrochemical values are given in eV and proton affinities are given in kJ/mole, see (5) for details of this approach.

| Substrate | $E(Q/QH_2)_{\text{gas}}$ | $E(Q/Q^{\cdot-})_{\text{gas}}$ | $E(Q^{\cdot-}/QH^{\cdot})_{\text{gas}}$ |
|-----------|--------------------------|--------------------------------|-----------------------------------------|
| (1)       | 0.42917                  | 3.0173                         | -1358.52166                             |
| (2)       | 0.37142                  | 2.72524                        | -1389.79882                             |
| (3)       | 0.38026                  | 2.74154                        | -1390.89793                             |
| (4)       | 0.2577                   | 2.61136                        | -1366.33902                             |
| (5)       | 0.27107                  | 2.7514                         | -1382.55804                             |
| (6)       | 0.21367                  | 2.6245                         | -1362.86664                             |
| (7)       | 0.12844                  | 2.78436                        | -1378.19247                             |

4

## References

1. Keegstra, E. M. D., Huisman, B. H., Paardekooper, E. M., Hoogesteger, F. J., Zwikker, J. W., Jenneskens, L. W., Kooijman, H., Schouten, A., Veldman, N., and Spek, A. L. (1996) 2,3,5,6-tetraalkoxy-1,4-benzoquinones and structurally related tetraalkoxy benzene derivatives: Synthesis, properties and solid state packing motifs, *Journal of the Chemical Society-Perkin Transactions 2*, 229-240.
2. Gu, L. Q., Yu, L., and Yu, C. A. (1990) Effect Of Substituents Of The Benzoquinone Ring On Electron-Transfer Activities Of Ubiquinone Derivatives, *Biochimica Et Biophysica Acta* 1015, 482-492.
3. Folkers, K., Catlin, J. C., and Daves, G. D. (1971) Coenzyme Q. 124. New substituted 2,3-dimethoxy-1,4-benzoquinones as inhibitors of coenzyme Q systems, *Journal of Medicinal Chemistry* 14, 45-48.
4. Gu, L. Q., Yu, L., and Yu, C. A. (1989) A ubiquinone derivative that inhibits mitochondrial cytochrome *bc<sub>L</sub>* complex but not chloroplast cytochrome *b<sub>6</sub>f* complex activity, *J Biol Chem* 264, 4506-4512.
5. Cape, J. L., Bowman, M. K., and Kramer, D. M. (2006) Computation of the redox and protonation properties of quinones: towards the prediction of redox cycling natural products, *Phytochemistry* 67, 1781-1788.
6. Foresman, J. B., and Frisch, A. (1993) *Exploring Chemistry with Electronic Structure Calculations*, Gaussian Inc., Pittsburgh, PA.
